# Supplementary figures and images for: Physical basis of large microtubule aster growth
Source: eLife journal article supplement (doi:10.7554/elife.19145), 2016-11-28

**A**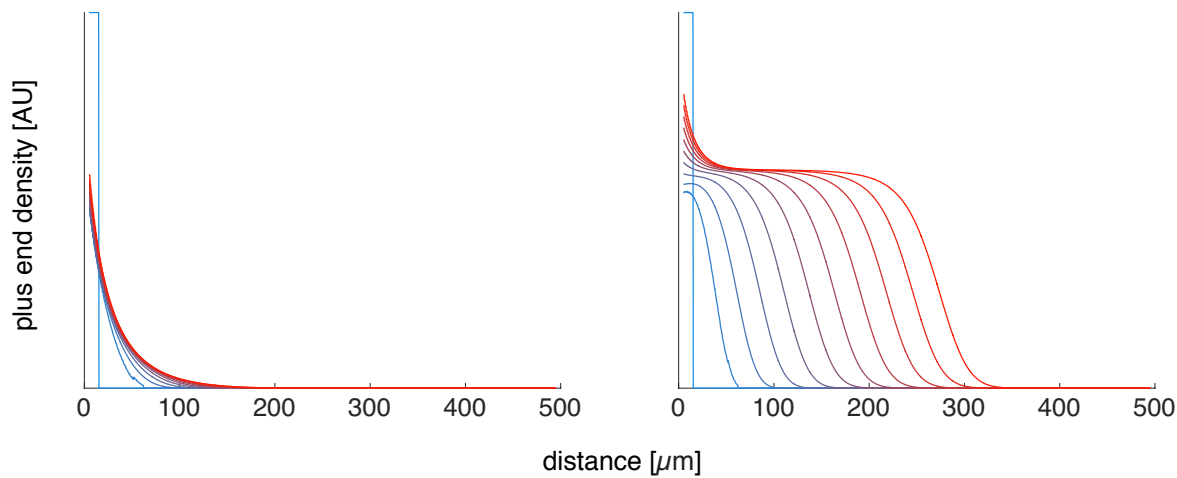**B**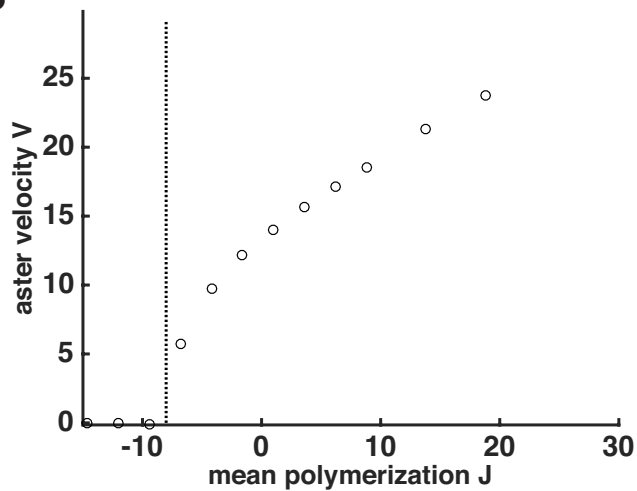**C**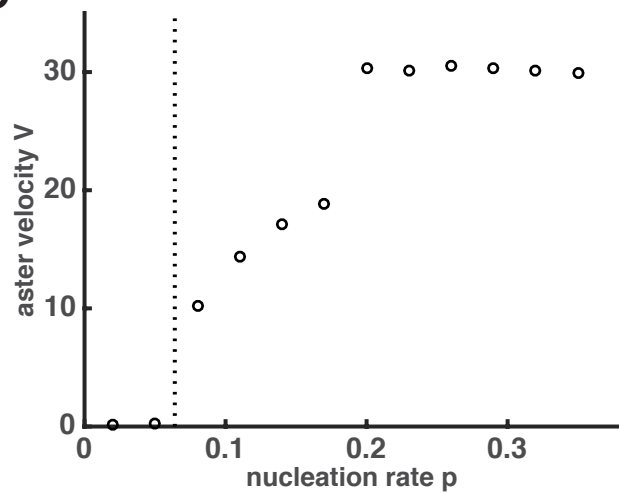

Supplement: supp [file elife-19145-supp-v1.zip]

**A**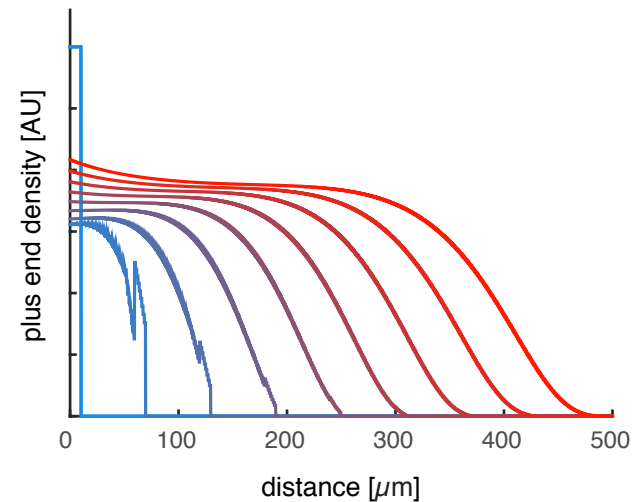**B**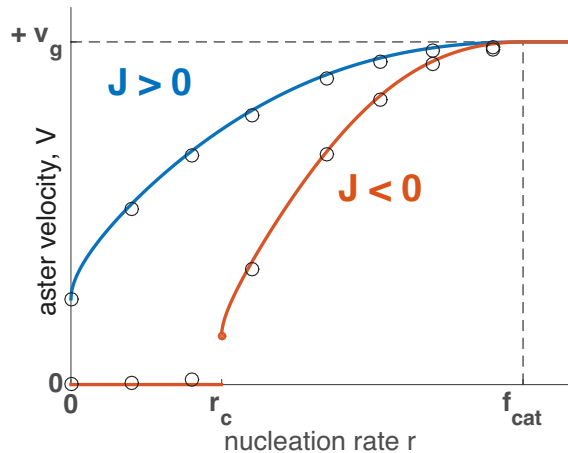

Supplement: supp [file elife-19145-supp-v1.zip]

**A**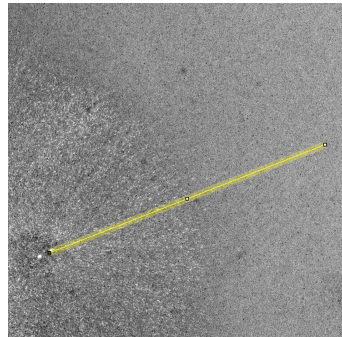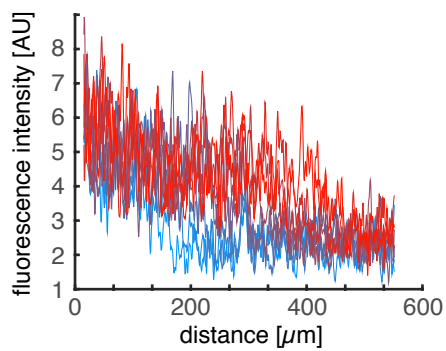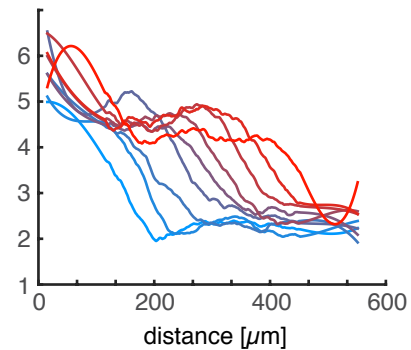**B**

+320 nM  
MCAK-Q710

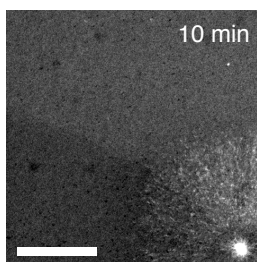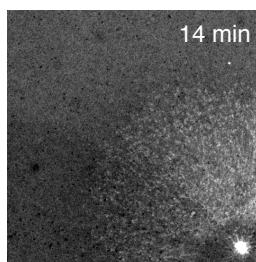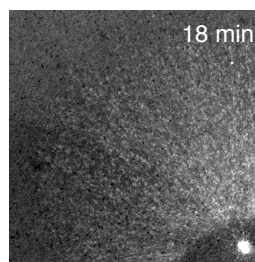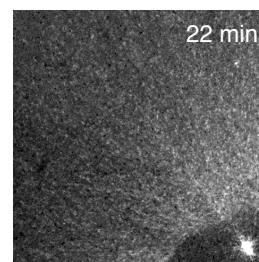

+320 nM  
MCAK-Q710

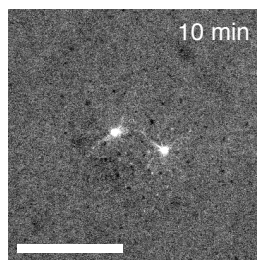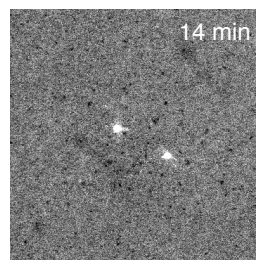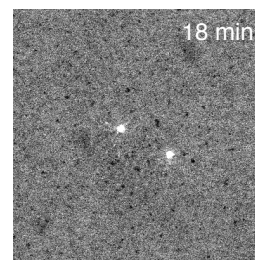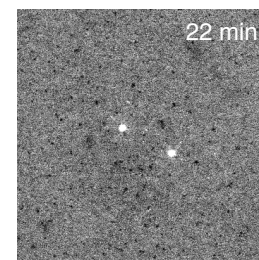**C**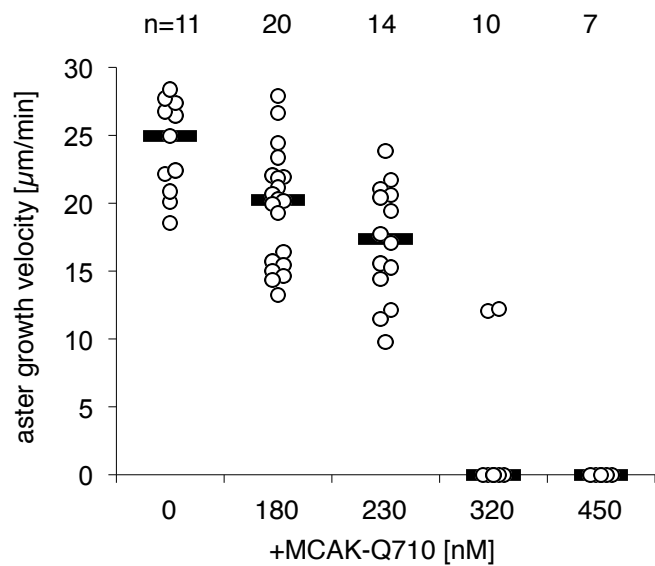

Supplement: supp [file elife-19145-supp-v1.zip]

**A**

pellicle aster  
+300 nM  
MCAK-Q710

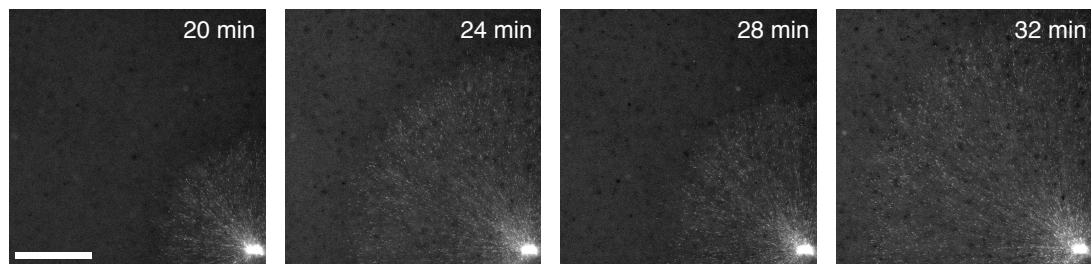

pellicle aster  
+495 nM  
MCAK-Q710

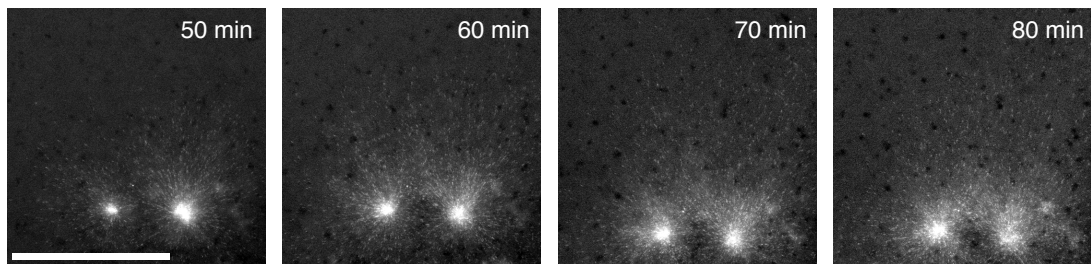**B**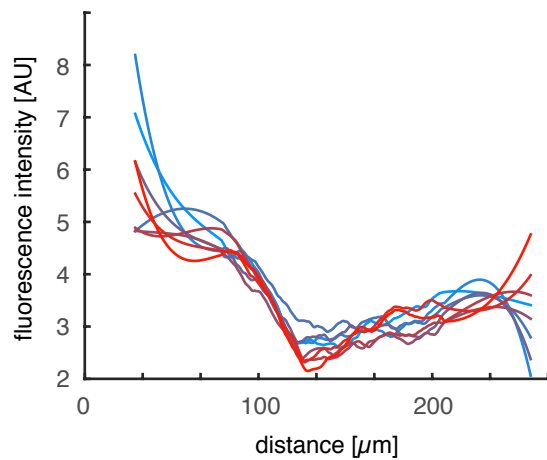**C**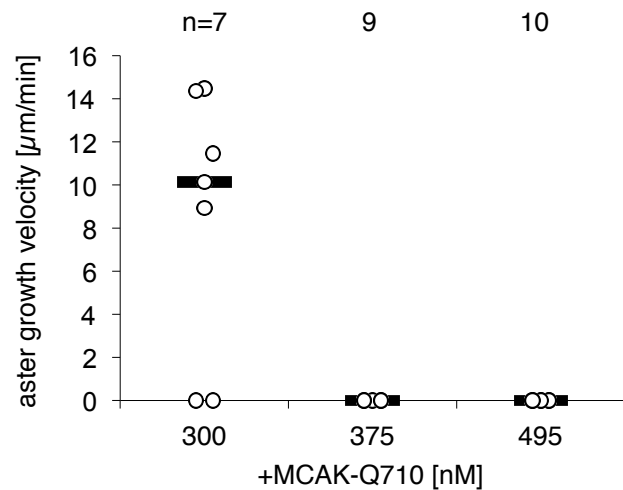

Supplement: supp [file elife-19145-supp-v1.zip]
